# Supplementary material for: Correlation between the regulation of intestinal bacteriophages by green tea polyphenols and the flora diversity in SPF mice
Source: Royal Society of Chemistry journal article supplement (doi:10.1039/d1fo03694g), 2022-01-01
Supplement: d1fo03694g1.pdf [file d1fo03694g1.pdf]

1           **Correlation between green tea polyphenols regulating intestinal**  
2           **bacteriophage and flora diversity in SPF mice**

3           Sashuang Dong<sup>1</sup>, Zilong Xin<sup>2</sup>, Wencan He<sup>3</sup>, Yuling Zhang<sup>1</sup>, Jiaqi Xiong<sup>1</sup>, Jie  
4           Wang<sup>1</sup>, Zhenlin Liao<sup>1</sup>, Li Wang<sup>1</sup>, Qingping Zhong<sup>1</sup>, Hong Wei<sup>3,4\*</sup>, Xiang Fang<sup>1\*</sup>

5           Affiliation:

6           <sup>1</sup> College of Food Science, South China Agricultural University, Guangzhou,  
7           Guangdong, 510630, P. R. China

8           <sup>2</sup> College of Engineering, South China Agricultural University, Guangzhou,  
9           510630, P. R. China

10          <sup>3</sup> Precision Medicine Institute, The First Affiliated Hospital, Sun Yat-sen  
11          University, Guangzhou, Guangdong, 510030, P. R. China

12          <sup>4</sup> Department of Laboratory Animal Science, College of Basic Medicine Science,  
13          Army Medical University, Chongqing, 400037, P. R. China

14

15          \* Corresponding Author:

16          Hong Wei

17          Email: [weihong63528@163.com](mailto:weihong63528@163.com)

18          Xiang Fang

19          Email: [fxiang@scau.edu.cn](mailto:fxiang@scau.edu.cn)

20

21

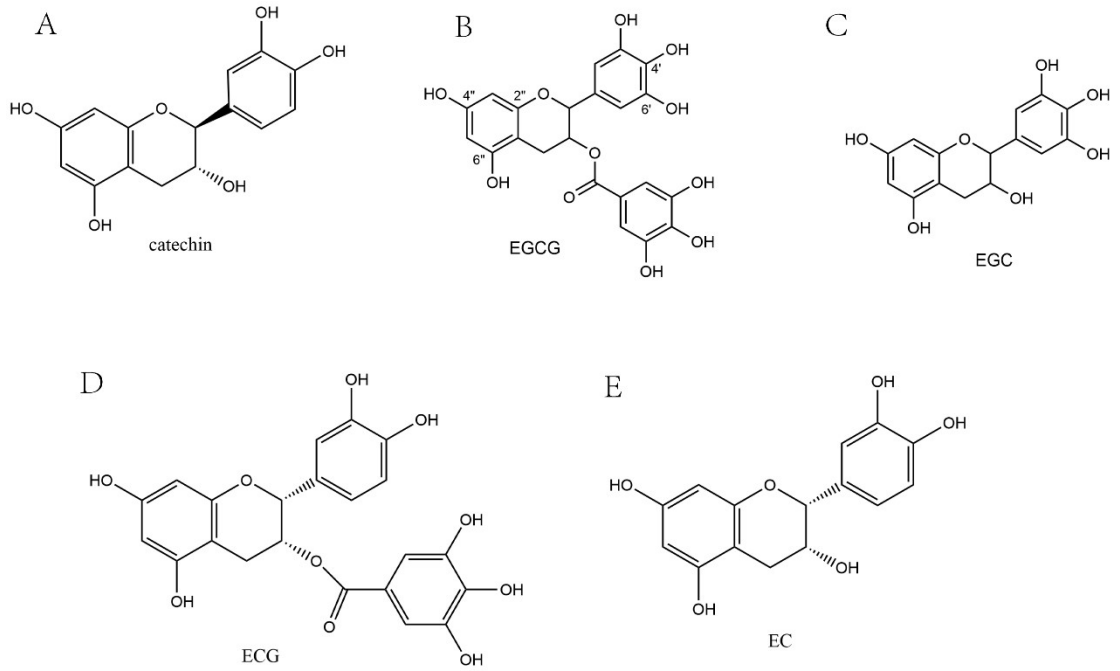

22

23 Supplementary Fig.1 Chemical structures of major tea polyphenols. A: Catechin;

24 B: Epigallocatechin gallate (EGCG); C: Epigallocatechin (EGC); D: Epicatechin

25 gallate (ECG); E: Epicatechin (EC)

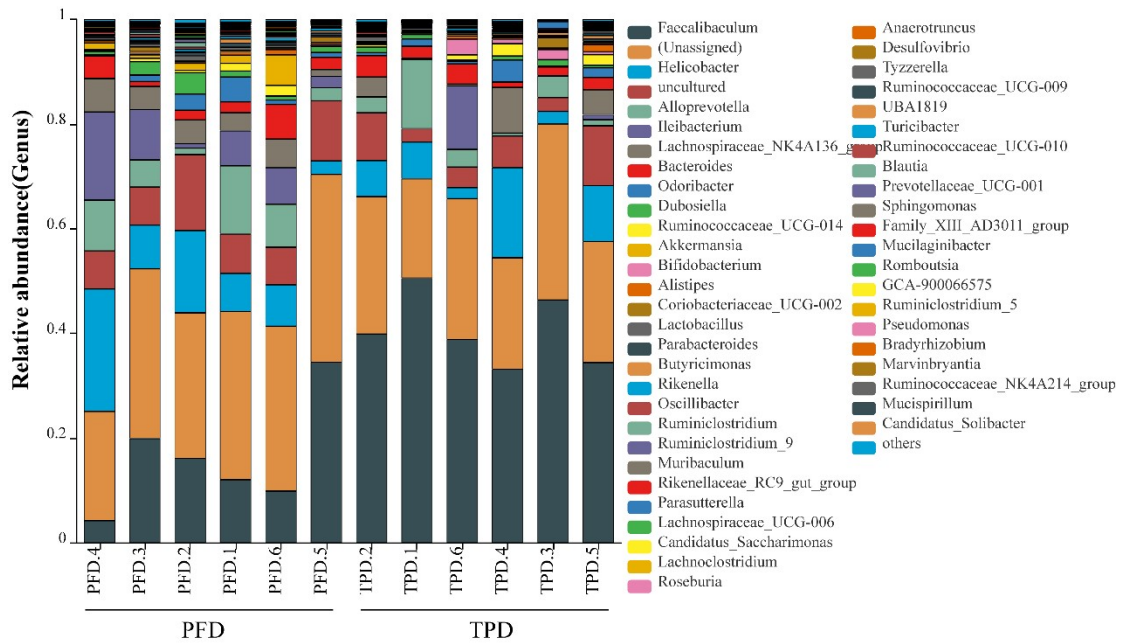

26

27 Supplementary Fig. 2 Relative abundance of top 50 bacteria at genus level

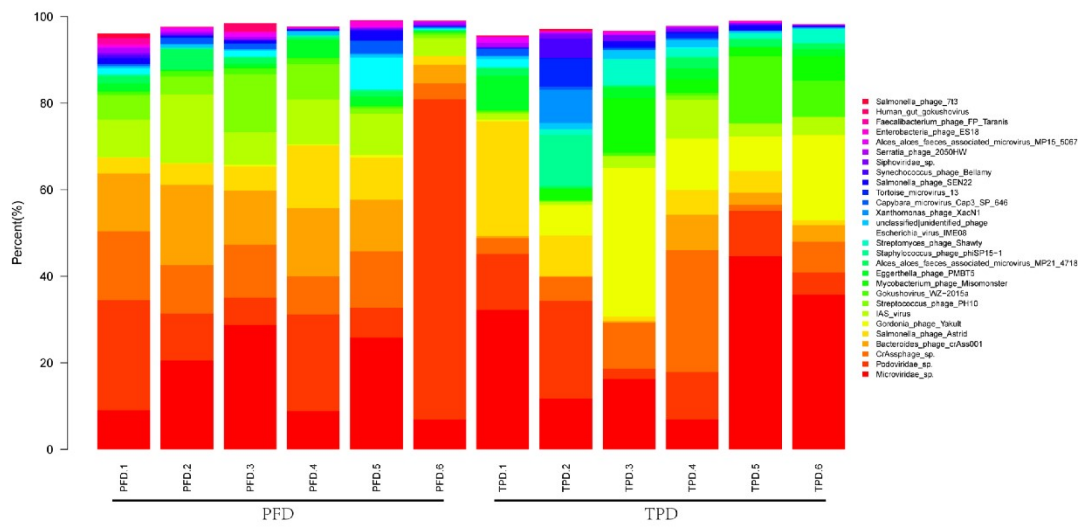

28

29 Supplementary Fig. 3 Relative abundance of main bacteriophages at the family level

30

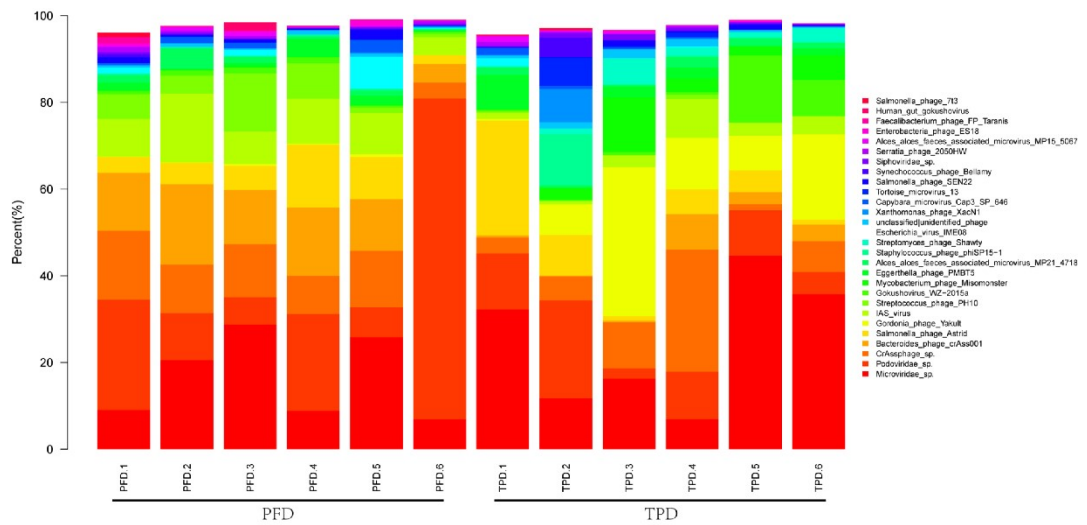

31

32 Supplementary Fig. 4 Relative abundance of top 28 caudovirales bacteriophages at the

33 species level

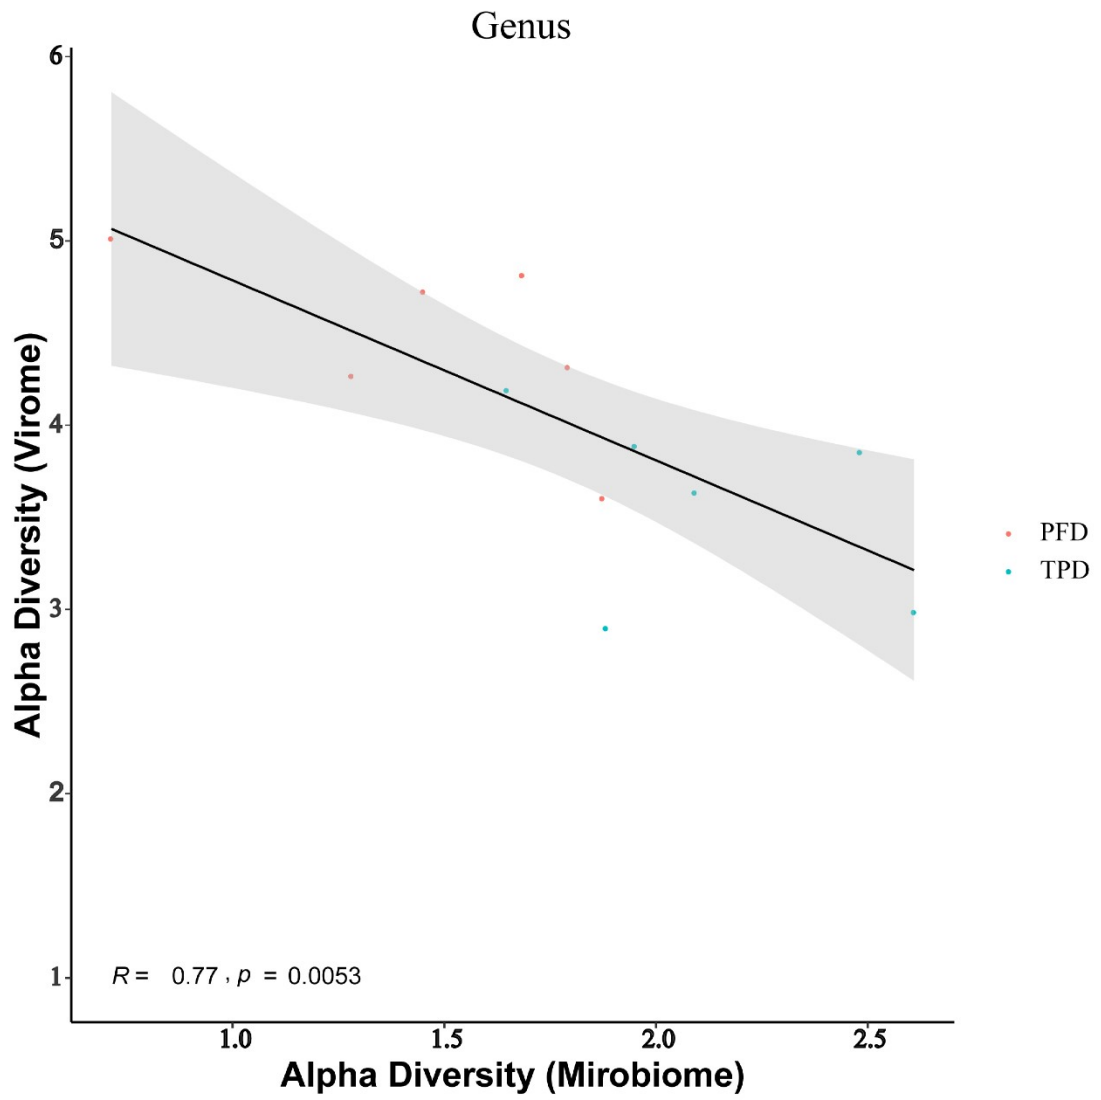

34

35 Supplementary Fig. 5 Virome diversity correlates with microbiome diversity in two

36 groups. (Spearman correlation coefficient = 0.77,  $p = 0.0053$ ,  $R^2 = 0.5929$ )

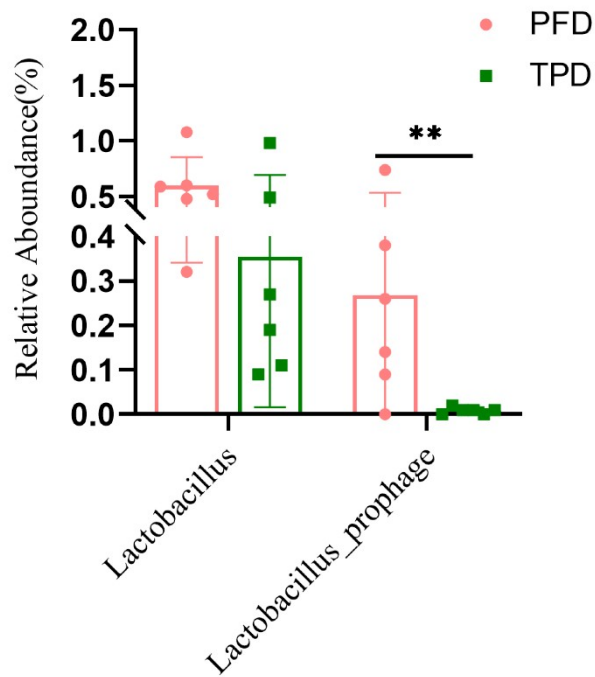

37

38 Supplementary Fig.6 Relative abundance of *Lactobacillus* and  
 39 *Lactobacillus\_prophage*. The statistical significantly correlations were displayed as

40 \* $p < 0.05$ , \*\* $p < 0.01$ .

41

42

43

44

45

46

47

48

49

50

51

52

## Supplementary table 1 AIN-93G feed formulation of mice chow food

| Ingredient            | kcal/g | g/kg        | kcal/g      |
|-----------------------|--------|-------------|-------------|
| Com Starch            | 4      | 397.5       | 1590        |
| Casein                | 4      | 200         | 800         |
| Maltodextrin          | 4      | 132         | 528         |
| Sucrose               | 4      | 100         | 400         |
| Soybean Oil           | 9      | 70          | 630         |
| Cellulose             | 0      | 50          | 0           |
| Mineral MixAIN-93G-MX | 1.6    | 35          | 56          |
| Vitamin MixAIN-93-VM  | 3.9    | 10          | 39          |
| L – Cystine           | 4      | 3           | 12          |
| Choline Bitartrate    | 0      | 2.5         | 0           |
| <b>Total</b>          |        | <b>1000</b> | <b>4055</b> |

53

54

## Supplementary table 2 The result statistics of denovo virus identification

| Sample                   | Total_base(Mb) | Total_num | Max_len | Min_len | N50  | GC     |
|--------------------------|----------------|-----------|---------|---------|------|--------|
| Novel.viral.contig.final | 4.57           | 2131      | 112567  | 300     | 5666 | 44.38% |

55

56

57

58

59

60

61

62

63

64

65

Supplementary table 3 The statistics of virus category

| Sample | Phages | Other_virus | Unclassified |
|--------|--------|-------------|--------------|
| PFD.1  | 75.97% | 10.80%      | 13.23%       |
| PFD.2  | 47.46% | 38.65%      | 13.89%       |
| PFD.3  | 59.52% | 1.45%       | 39.03%       |
| PFD.4  | 89.43% | 1.60%       | 8.97%        |
| PFD.5  | 41.76% | 0.29%       | 57.96%       |
| PFD.6  | 35.81% | 2.80%       | 61.40%       |
| TPD.1  | 61.83% | 0.52%       | 37.65%       |
| TPD.2  | 86.96% | 2.41%       | 10.63%       |
| TPD.3  | 76.62% | 0.99%       | 22.38%       |
| TPD.4  | 79.10% | 8.96%       | 11.94%       |
| TPD.5  | 61.61% | 0.23%       | 38.16%       |
| TPD.6  | 93.15% | 0.91%       | 5.94%        |

67

68

69

70

71

72

73

74

Supplementary table 4 The statistics of RNA and DNA virus category

| Sample | DNA    | RNA   | Unclassified |
|--------|--------|-------|--------------|
| PFD.1  | 86.75% | 0.02% | 13.23%       |
| PFD.2  | 86.09% | 0.02% | 13.89%       |
| PFD.3  | 60.97% | 0.00% | 39.03%       |
| PFD.4  | 91.03% | 0.00% | 8.97%        |
| PFD.5  | 42.04% | 0.00% | 57.96%       |
| PFD.6  | 38.60% | 0.00% | 61.40%       |
| TPD.1  | 62.35% | 0.00% | 37.65%       |
| TPD.2  | 89.37% | 0.00% | 10.63%       |
| TPD.3  | 77.62% | 0.00% | 22.38%       |
| TPD.4  | 88.06% | 0.00% | 11.94%       |
| TPD.5  | 61.84% | 0.00% | 38.16%       |
| TPD.6  | 94.06% | 0.00% | 5.94%        |

76

77

78

79

80

81

82

83
